# Supplementary material for: A novel 2D Eu-MOF as a dual-functional fluorescence sensor for detection of benzaldehyde and Fe3+
Source: Royal Society of Chemistry journal article supplement (doi:10.1039/d4dt01512f), 2024-01-01
Supplement: d4dt01512f1.pdf [file d4dt01512f1.pdf]

## Supplementary Information

### A Novel 2D Eu-MOF as a Dual-Functional Fluorescence

#### Sensor for Detection of benzaldehyde and Fe<sup>3+</sup>

Xiaole Wang<sup>a</sup> and Weisheng Liu<sup>\*a</sup>

<sup>a</sup>Key Laboratory of Nonferrous Metals Chemistry and Resources Utilization of Gansu Province, State Key Laboratory of Applied Organic Chemistry and College of Chemistry and Chemical Engineering, Lanzhou University, 730000, Lanzhou, China.  
E-mail: liuws@lzu.edu.cn.

#### Materials and instruments:

All solvents and reagents were commercially available A.R. grade and used without further purification. Powder X-ray diffraction data were obtained by using a PAN type X'Pert Pro diffractometer operated at 40 kV and 40 mA with Cu K $\alpha$  radiation. The FT-IR spectra were recorded from KBr pellets in the range from 4000 to 500 cm<sup>-1</sup> on a Bruker VERTEX 70 spectrometer, and the UV-visible spectrum was measured by the UV-2700 UV-VIS Spectrophotometer. Thermogravimetric analyses were obtained on a NETZSCH STA 449 F3 Jupiter® under a N<sub>2</sub> atmosphere. The luminescence spectrum was measured by the Hitachi T-7000FL fluorescence spectrometer.

#### X-ray Structural Crystallography:

Single-crystal X-ray diffraction data were collected on Agilent Super Nova Single Crystal Diffractometer equipped with graphite-monochromatic Mo-K $\alpha$  source ( $\lambda=0.71073$  Å). The crystal was kept at 150.00(11) K during data collection. Using Olex2<sup>1</sup>, the structure was solved with the SHELXT<sup>2</sup> structure solution program using Intrinsic Phasing and refined with the SHELXL<sup>3</sup> refinement package using Least Squares minimization.

## Synthesis of ligand:

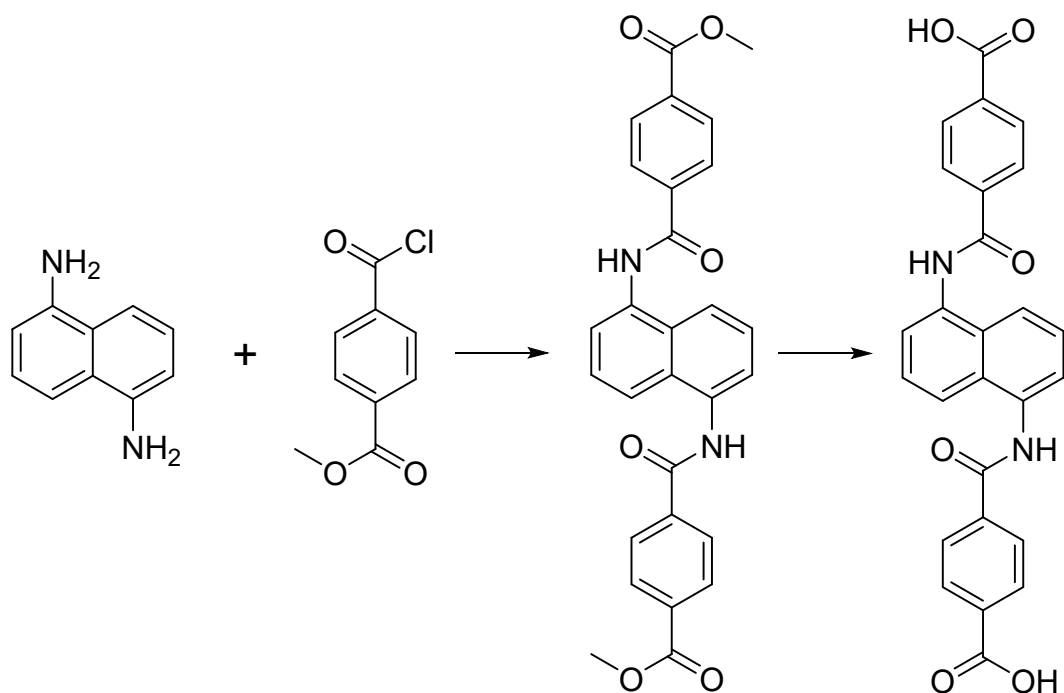

**Scheme S1.** Synthesis of ligand.

Methyl 4-(chlorocarbonyl)benzoate (2.67 g, 13.44 mmol) was dispersed with 1,5-diaminonaphthalene (1.028 g, 6.5 mmol) in dichloromethane (100 mL) under stirring conditions. The reaction system was placed in an ice bath and allowed to cool to 0 °C. Triethylamine (2 ml, excess) was added dropwise to the mixture using a constant pressure funnel and stirred, after which the ice bath was removed and the mixture was allowed to continue stirring at room temperature for one hour. The system was then heated to reflux for 48 h. A large amount of grey solid was observed. At the end of the reaction, the solvent was removed by distillation under reduced pressure and washed with dilute hydrochloric acid, water, saturated sodium bicarbonate solution, and water, respectively, and dried to obtain a grey solid powder. The solid obtained in the previous step of the reaction was added to 80 mL of a methanol-water mixture (methanol: water = 5: 1) of potassium hydroxide (1.122 g, 20 mmol) and stirred at reflux with heating at 90 °C for 36 h. Gradual dissolution of the solid was observed to give a dark-coloured clarified solution. After the solution was concentrated to about 20 ml by reduced

pressure distillation, its pH was adjusted to 3 by adding dilute hydrochloric acid, and a large amount of grey solid was precipitated, which was filtered, washed and dried to obtain the solid powder H<sub>2</sub>L (4,4'-((naphthalene-1,5-diylbis(azanediyl))bis(carbonyl))dibenzoic acid) (2.54 g, yield: 86%).

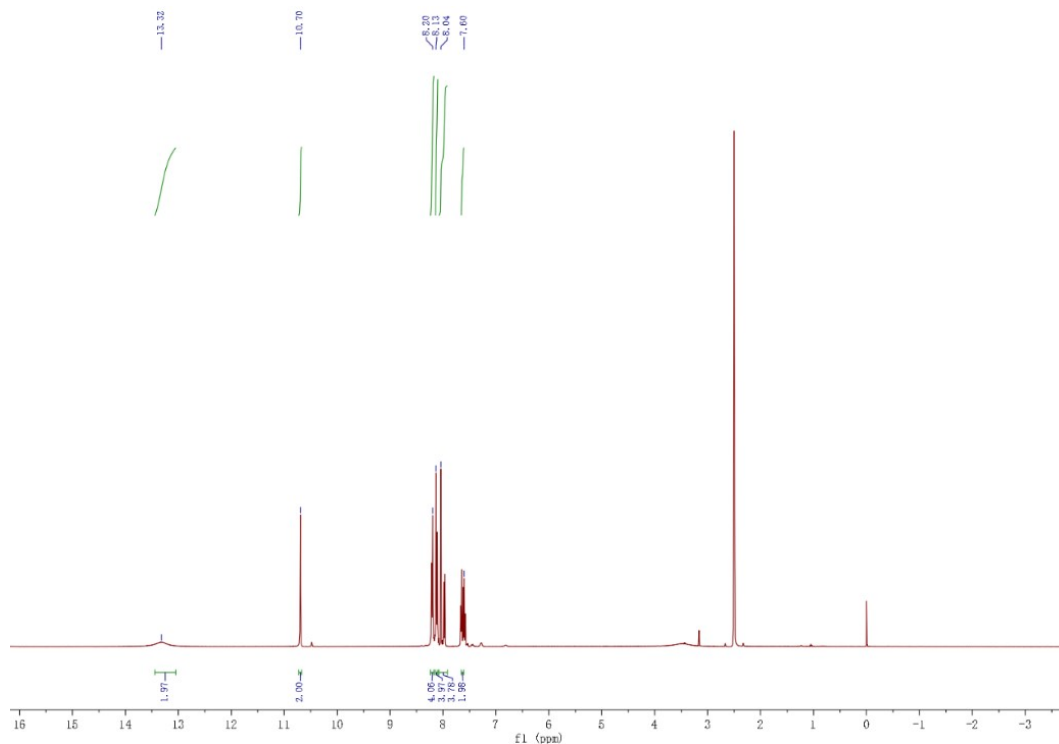

**Figure S1. (a)** <sup>1</sup>H NMR spectra of Ligand (DMSO-d<sub>6</sub>, 400MHz).

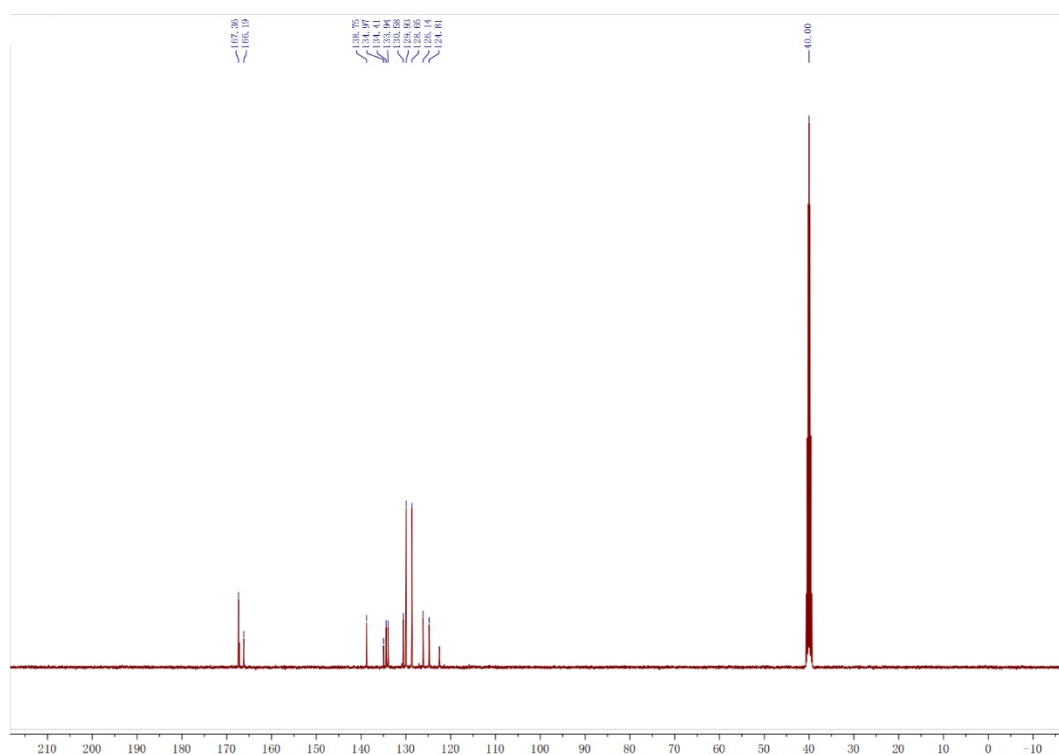

**Figure S1. (b)**  $^{13}\text{C}$  NMR spectra of Ligand (DMSO- $d_6$ , 101MHz).

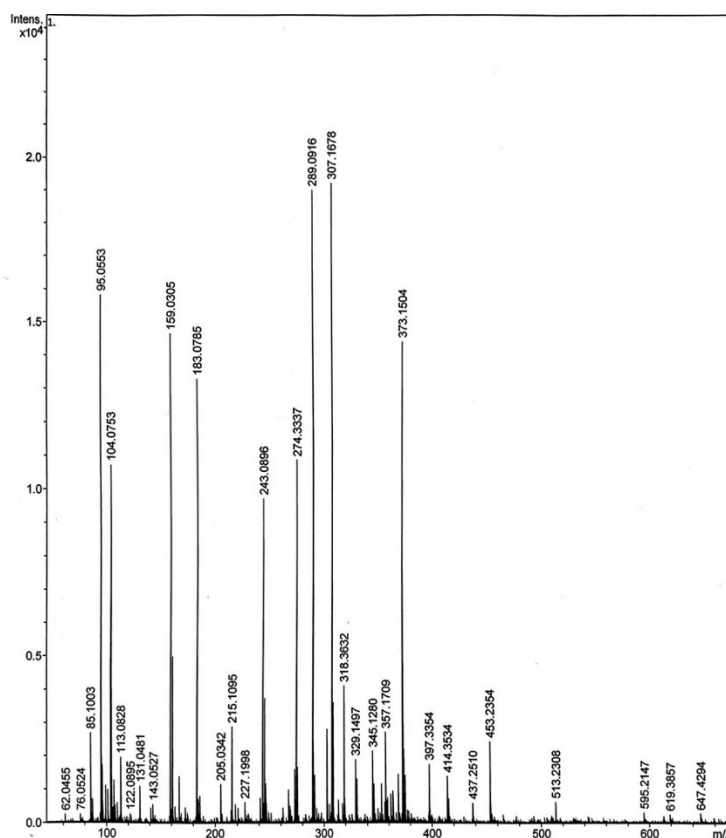

**Figure S1. (c)** Mass spectra of Ligand.

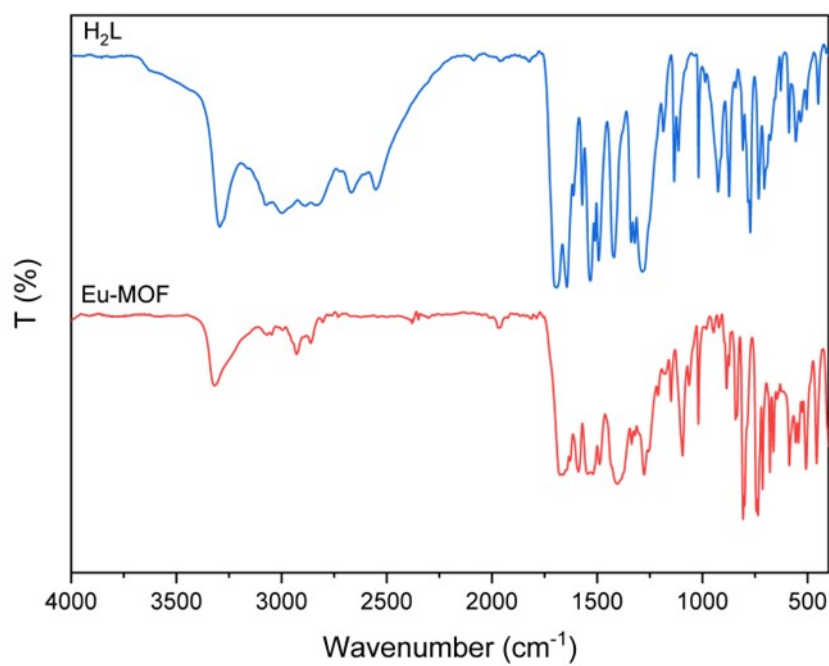

**Figure S2.** FT-IR spectra of the Eu-MOF and ligand.

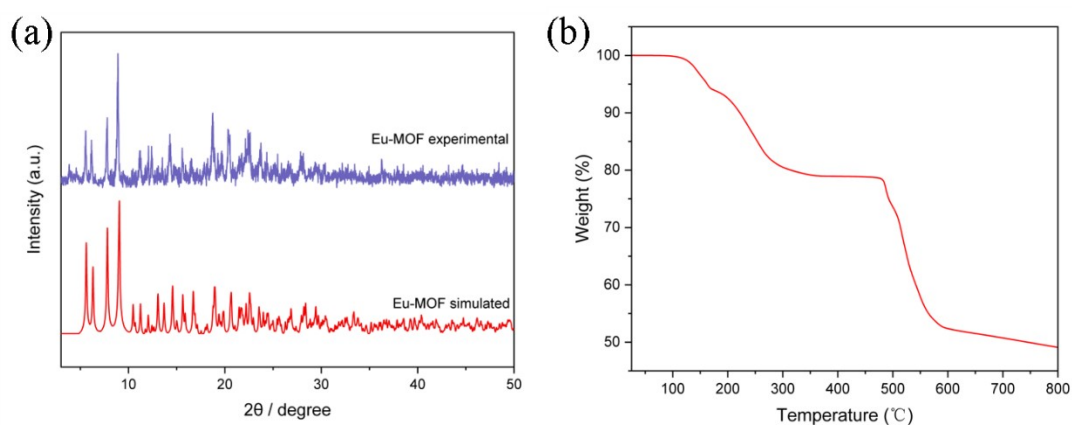

**Figure S3.** (a) The PXRD patterns of Eu-MOF. (b) TGA plot of the Eu-MOF.

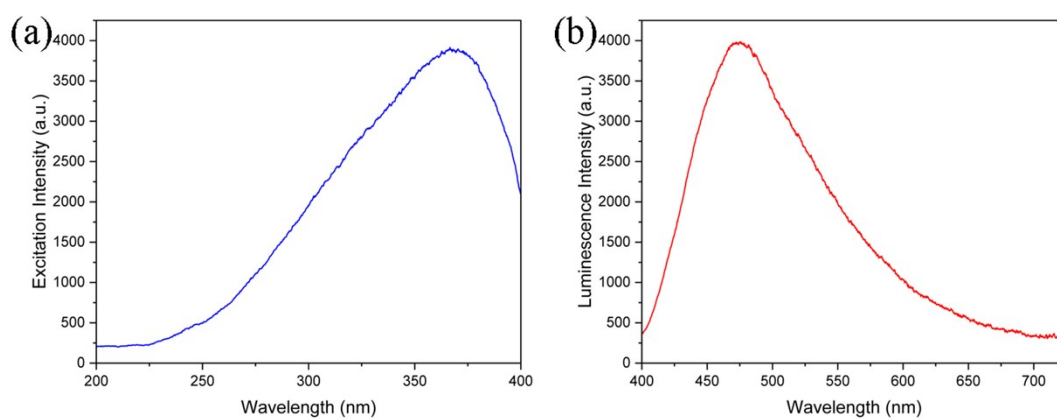

**Figure S4.** (a) The solid-state excitation spectrum of H<sub>2</sub>L at room temperature ( $\lambda_{em} = 473$  nm). (b) The solid-state emission spectrum of H<sub>2</sub>L at room temperature ( $\lambda_{ex} = 367$  nm).

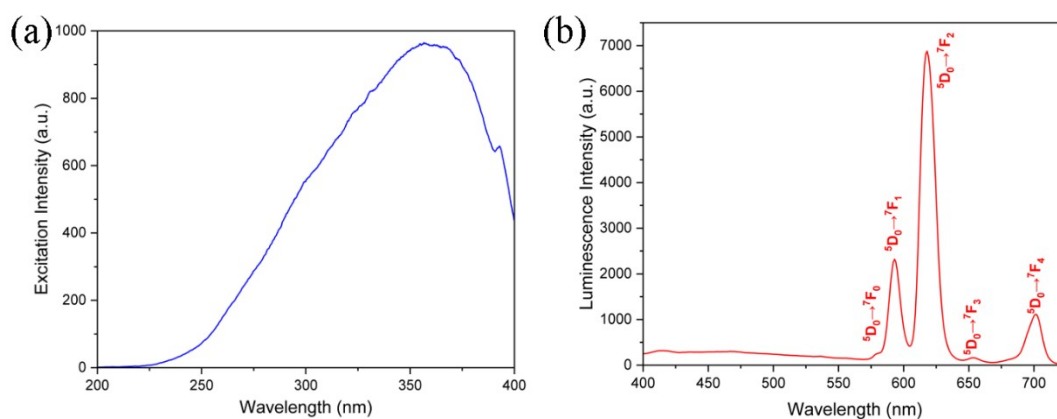

**Figure S5.** (a) The solid-state excitation spectrum of Eu-MOF at room temperature ( $\lambda_{em} = 618$  nm). (b) The solid-state emission spectrum of Eu-MOF at room temperature ( $\lambda_{ex} = 367$  nm).

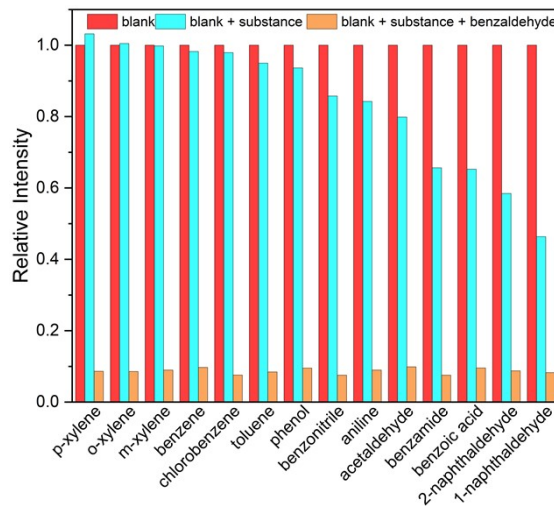

**Figure S6.** The relative luminous intensity of Eu-MOF dispersed in various solutions with and without benzaldehyde.

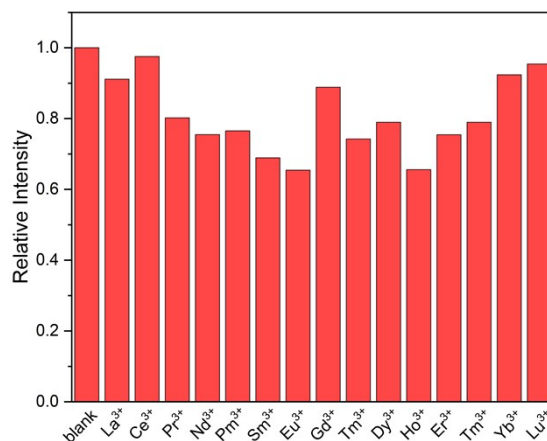

**Figure S7.** Comparison of the luminescence intensity at 618 nm for systems incorporating different lanthanide ions.

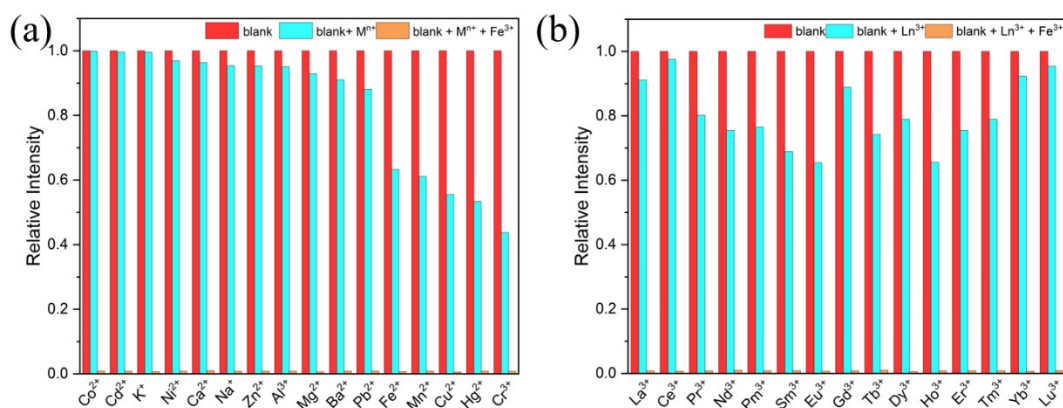

**Figure S8.** The relative luminous intensity of Eu-MOF dispersed in various solutions with and without Fe<sup>3+</sup>.

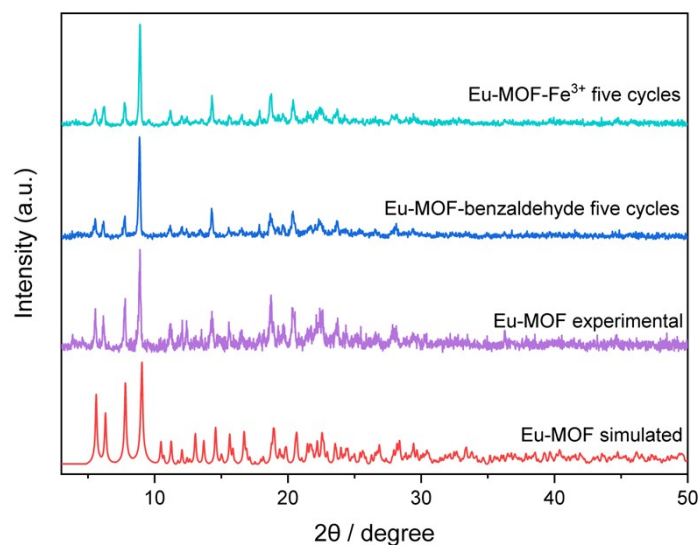

**Figure S9.** The PXRD patterns of Eu-MOF and Eu-MOF after five cycles experiment for the detection of benzaldehyde and  $\text{Fe}^{3+}$ .

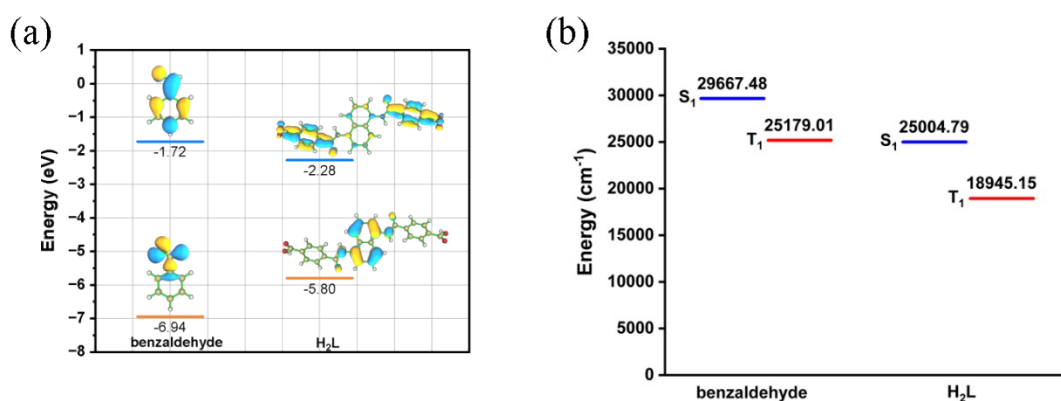

**Figure S10.** (a) LUMO and HOMO energy levels of benzaldehyde and ligand calculated by the DFT at the B3LYP/6-31 G level. (b) S<sub>1</sub> and T<sub>1</sub> energy levels of benzaldehyde and ligand.

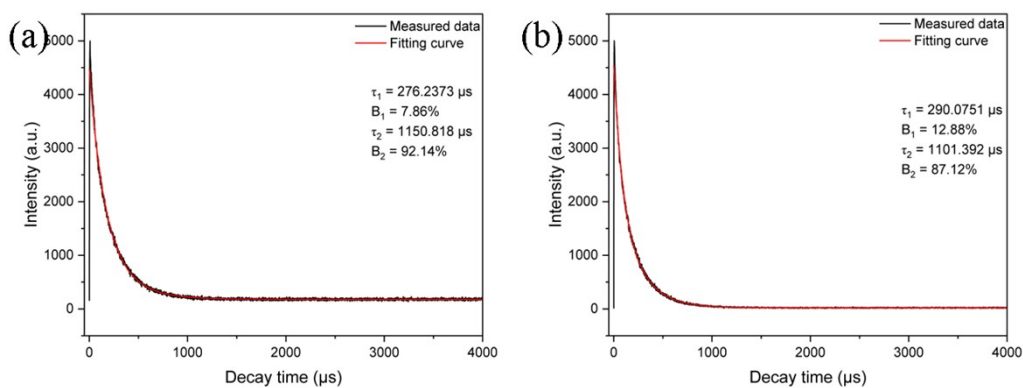

**Figure S11.** (a) Fluorescence lifetime of Eu-MOF measured in benzyl alcohol. (b) Fluorescence lifetime of Eu-MOF after addition of benzaldehyde.

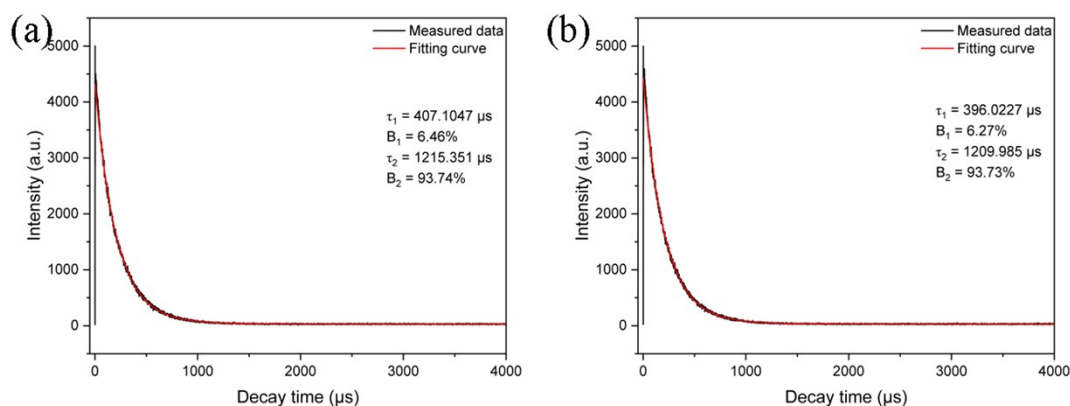

**Figure S12.** (a) Fluorescence lifetime of Eu-MOF measured in DMF; (b) Fluorescence lifetime of Eu-MOF after  $\text{Fe}^{3+}$  addition.

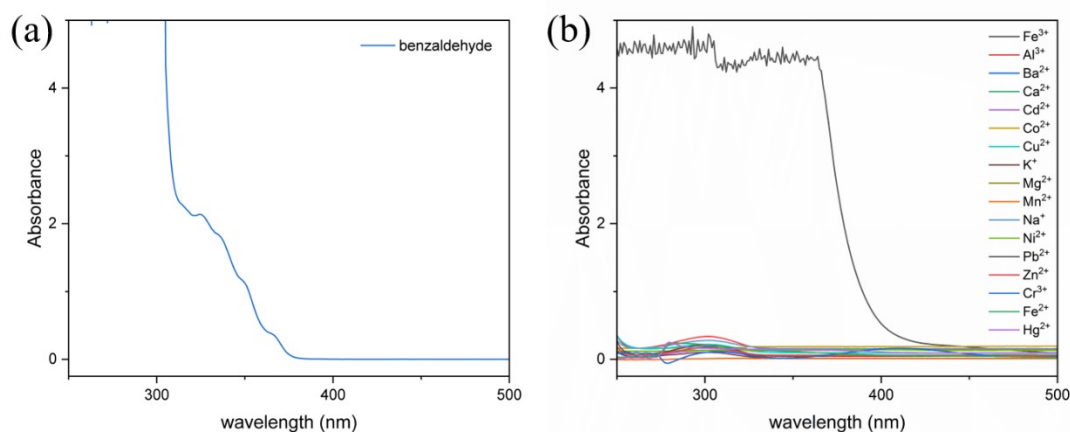

**Figure S13.** Ultraviolet-visible absorption spectra of (a) benzaldehyde and (b) various metal cations.

**Table S1.** Performance of fluorescent sensors for the detection of benzaldehyde.

| Sensor                                                                                | Analyte      | $K_{sv}$ ( $\text{M}^{-1}$ ) | LOD (M)               | Ref       |
|---------------------------------------------------------------------------------------|--------------|------------------------------|-----------------------|-----------|
| Eu-MOF                                                                                | Benzaldehyde | 2283                         | $9.3 \times 10^{-6}$  | This work |
| $[\text{Zn}_2(\text{DPA})(\text{OBA})_2] \cdot 2\text{DMF} \cdot 4\text{H}_2\text{O}$ | Benzaldehyde | 27.79                        | $3.8 \times 10^{-3}$  | 4         |
| ANDP                                                                                  | Benzaldehyde | 1505                         | $3.98 \times 10^{-5}$ | 5         |
| $[\text{Ni}(5\text{-NIP})(\text{L})(\text{H}_2\text{O})]_n$                           | Benzaldehyde | 3881                         | $5.86 \times 10^{-5}$ | 6         |
| $[\text{Ni}(1,4\text{-PDA})(\text{L})(\text{H}_2\text{O})]_n$                         | Benzaldehyde | 2162                         | $7.32 \times 10^{-5}$ | 6         |
| $[\text{Co}(\text{OBA})(\text{L}1)_{0.5}]_n$                                          | Benzaldehyde | 1097                         | $2.23 \times 10^{-6}$ | 9         |
| $[\text{Eu}(\text{L})(\text{HCOO})(\text{H}_2\text{O})]_n$                            | Benzaldehyde | 1295                         | $1.1 \times 10^{-6}$  | 12        |
| $[\text{Tb}(\text{L})(\text{HCOO})(\text{H}_2\text{O})]_n$                            | Benzaldehyde | 989                          | $1.9 \times 10^{-6}$  | 12        |
| $[\text{Tb}(\text{bidc})(\text{Hbidc})(\text{H}_2\text{O})]_n$                        | Benzaldehyde | 734                          | $1.44 \times 10^{-4}$ | 14        |
| $[\text{Tb}_3(\text{bidc})_4(\text{HCOO})(\text{DMF})]_n$                             | Benzaldehyde | 3664                         | $1.35 \times 10^{-5}$ | 14        |
| $[\{\text{Eu}(\text{SIP})(\text{H}_2\text{O})_4\}]_n$                                 | Benzaldehyde | 9800                         | $1 \times 10^{-6}$    | 15        |



**Table S2.** Performance of MOF-based fluorescent sensors for the detection of Fe<sup>3+</sup>.

| Sensor                                                          | Analyte          | K <sub>sv</sub> (M <sup>-1</sup> ) | LOD (M)                  | Ref       |
|-----------------------------------------------------------------|------------------|------------------------------------|--------------------------|-----------|
| Eu-MOF                                                          | Fe <sup>3+</sup> | 3656                               | 5.8 × 10 <sup>-6</sup>   | This work |
| [Ni(5-NIP)(L)(H <sub>2</sub> O)] <sub>n</sub>                   | Fe <sup>3+</sup> | 1651                               | 6.57 × 10 <sup>-5</sup>  | 6         |
| [Ni(1,4-PDA)(L)(H <sub>2</sub> O)] <sub>n</sub>                 | Fe <sup>3+</sup> | 2810                               | 5.85 × 10 <sup>-5</sup>  | 6         |
| [Cd <sub>0.5</sub> (TBTA) <sub>0.5</sub> (L1)] <sub>n</sub>     | Fe <sup>3+</sup> | 6186                               | 2.645 × 10 <sup>-5</sup> | 7         |
| 534-MOF-Tb                                                      | Fe <sup>3+</sup> | 5510                               | 0.13 × 10 <sup>-3</sup>  | 8         |
| [Co(OBA)(L1) <sub>0.5</sub> ] <sub>n</sub>                      | Fe <sup>3+</sup> | 3540                               | 6.92 × 10 <sup>-5</sup>  | 9         |
| [Co(HBTC)(L2)] <sub>n</sub>                                     | Fe <sup>3+</sup> | 1970                               | 1.016 × 10 <sup>-5</sup> | 9         |
| 1-Eu                                                            | Fe <sup>3+</sup> | 5300                               | 1.16 × 10 <sup>-3</sup>  | 10        |
| [Zn(PrOip)(bpp)(H <sub>2</sub> O)] <sub>n</sub>                 | Fe <sup>3+</sup> | 4404                               | 6.676 × 10 <sup>-5</sup> | 11        |
| {[Zn(nBuOip)(bpp)]·2H <sub>2</sub> O} <sub>n</sub>              | Fe <sup>3+</sup> | 1474                               | 5.442 × 10 <sup>-5</sup> | 11        |
| {[Zn( <sup>t</sup> BuOip)(bpp)]·2H <sub>2</sub> O} <sub>n</sub> | Fe <sup>3+</sup> | 1714                               | 1.773 × 10 <sup>-5</sup> | 11        |
| [Zn(p-CNPhHIDC)(4,4'-bipy)] <sub>n</sub>                        | Fe <sup>3+</sup> | 1370                               | 5 × 10 <sup>-3</sup>     | 13        |
| [Cd(p-CNPhHIDC)(4,4'-bipy) <sub>0.5</sub> ] <sub>n</sub>        | Fe <sup>3+</sup> | 1990                               | 5 × 10 <sup>-3</sup>     | 13        |

## References

- Dolomanov, O.V., Bourhis, L.J., Gildea, R.J, Howard, J.A.K. & Puschmann, H. (2009). *J. Appl. Cryst.*, **42**, 339-341.
- Sheldrick, G.M. (2015). *Acta Cryst.* **A71**, 3-8.
- Sheldrick, G.M. (2015). *Acta Cryst.* **C71**, 3-8.
- S.M. Zhao, Z.F. Qiu, Z.H. Xu, Z.Q. Huang, Y. Zhao, W.Y. Sun, (2022). *Dalt. Trans.*, **51**, 3572–3580,
- Verma, T., Verma, P., & Singh, U. P. (2023). *Microchem. J.*, **191**, 108771.
- K. Lyu, Y. Wei, Y. Li, G. Cui, (2021). *J. Mol. Struct.* **1225**, 129128–129138.
- Liu, Y., Han, C., & Cui, G. H.(2021). *Inorg. Chim. Acta.*, **525**, 120499.
- Chen, M., Xu, W. M., Tian, J. Y., Cui, H., Zhang, J. X., Liu, C. S., & Du, M. (2017). *J. Mater. Chem. C*, **5**, 2015-2021.
- Liu, Y., Ren, L., & Cui, G. H. (2021). *CrystEngComm*, **23**, 7485-7495.
- Tong, W. Q., Liu, T. T., Li, G. P., Liang, J. Y., Hou, L., & Wang, Y. Y. (2018). *New J. Chem.*, **42**, 9221-9227.
- Zhu, R. R., Wang, T., Wang, D. W., Yan, T., Wang, Q., Li, H. X. & Zhao, Q. H. (2019). *New J. Chem.*, **43**, 1494-1504.
- Sun, Z., Yang, M., Ma, Y., & Li, L. (2017). *Cryst Growth Des.*, **17**, 4326-4335.

13. Zhang, J., Zhao, L., Liu, Y., Li, M., Li, G. & Meng, X. (2018). *New J. Chem*, **42**, 6839-6847.
14. Wang, L., He, Q. Q., Gao, Q., Xu, H., Zheng, T. F., Zhu, Z. H. & Wen, H. R. (2023). *Inorg. Chem*, **62**, 3799-3807.
15. Che, X. J., Hou, S. L., Shi, Y., Yang, G. L., Hou, Y. L. & Zhao, B. (2019). *Dalt. Trans.*, **48**, 3453-3458.

**Table S3.** Crystal data and structure refinement for the Eu-MOF.

| CCDC                               | 2337133                                                          |
|------------------------------------|------------------------------------------------------------------|
| Empirical formula                  | C <sub>42</sub> H <sub>31</sub> EuN <sub>4</sub> O <sub>10</sub> |
| Formula weight                     | 903.67                                                           |
| Temperature/K                      | 150.00(11)                                                       |
| Crystal system                     | triclinic                                                        |
| Space group                        | P-1                                                              |
| a/Å                                | 9.87340(10)                                                      |
| b/Å                                | 14.1754(2)                                                       |
| c/Å                                | 15.9145(2)                                                       |
| α/°                                | 98.4420(10)                                                      |
| β/°                                | 90.8970(10)                                                      |
| γ/°                                | 92.6890(10)                                                      |
| Volume/Å <sup>3</sup>              | 2200.25(5)                                                       |
| Z                                  | 2                                                                |
| ρ <sub>calc</sub> /cm <sup>3</sup> | 1.364                                                            |
| μ/mm <sup>-1</sup>                 | 1.482                                                            |
| F(000)                             | 908.0                                                            |
| Crystal size/mm <sup>3</sup>       | 0.07 × 0.06 × 0.04                                               |
| Radiation                          | Mo Kα (λ = 0.71073)                                              |
| 2θ range for data collection/°     | 4.924 to 62.182                                                  |
| Index ranges                       | -12 ≤ h ≤ 13, -20 ≤ k ≤ 20, -22 ≤ l ≤ 22                         |
| Reflections collected              | 70486                                                            |
| Independent reflections            | 12054 [R <sub>int</sub> = 0.0691, R <sub>sigma</sub> = 0.0525]   |

---

|                                                |                                  |
|------------------------------------------------|----------------------------------|
| Data/restraints/parameters                     | 12054/13/525                     |
| Goodness-of-fit on $F^2$                       | 1.042                            |
| Final R indexes [ $I \geq 2\sigma(I)$ ]        | $R_1 = 0.0296$ , $wR_2 = 0.0585$ |
| Final R indexes [all data]                     | $R_1 = 0.0370$ , $wR_2 = 0.0613$ |
| Largest diff. peak/hole / $e \text{ \AA}^{-3}$ | 1.49/-0.61                       |

---

**Table S4.** Bond Lengths for the Eu-MOF.

| <b>Atom</b> | <b>Atom</b> | <b>Length/Å</b> | <b>Atom</b> | <b>Atom</b> | <b>Length/Å</b> |
|-------------|-------------|-----------------|-------------|-------------|-----------------|
| Eu1         | Eu11        | 4.30922(17)     | C4          | C10         | 1.505(3)        |
| Eu1         | O11         | 2.4175(14)      | C5          | C19         | 1.374(3)        |
| Eu1         | O3          | 2.3825(16)      | C5          | C39         | 1.400(3)        |
| Eu1         | O4          | 2.3144(13)      | C6          | C16         | 1.380(3)        |
| Eu1         | O62         | 2.3509(14)      | C6          | C24         | 1.389(3)        |
| Eu1         | O8          | 2.3159(13)      | C7          | C39         | 1.370(3)        |
| Eu1         | O103        | 2.3627(13)      | C7          | C42         | 1.414(3)        |
| Eu1         | O114        | 2.3725(13)      | C8          | C14         | 1.509(3)        |
| Eu1         | C11         | 3.1779(19)      | C10         | C12         | 1.388(3)        |
| O1          | C1          | 1.262(2)        | C10         | C20         | 1.388(3)        |
| O2          | C37         | 1.214(3)        | C11         | C21         | 1.410(3)        |
| O3          | C36         | 1.230(3)        | C11         | C30         | 1.364(3)        |
| O4          | C8          | 1.259(2)        | C12         | C22         | 1.389(3)        |
| O5          | C33         | 1.255(4)        | C13         | C16         | 1.391(3)        |
| O6          | C4          | 1.263(2)        | C13         | C32         | 1.391(3)        |
| O7          | C27         | 1.235(3)        | C14         | C18         | 1.389(3)        |
| O8          | C1          | 1.261(2)        | C14         | C38         | 1.385(3)        |
| O9          | C33         | 1.297(6)        | C15         | C20         | 1.386(3)        |
| O10         | C8          | 1.252(2)        | C15         | C26         | 1.391(3)        |
| O11         | C4          | 1.258(2)        | C17         | C29         | 1.371(3)        |

| Atom | Atom | Length/Å | Atom | Atom | Length/Å |
|------|------|----------|------|------|----------|
| N1   | C30  | 1.428(2) | C18  | C40  | 1.381(3) |
| N1   | C33  | 1.330(3) | C19  | C34  | 1.424(3) |
| N2   | C19  | 1.423(3) | C21  | C23  | 1.365(3) |
| N2   | C27  | 1.348(3) | C22  | C26  | 1.386(3) |
| N3   | C25  | 1.441(3) | C23  | C34  | 1.419(3) |
| N3   | C37  | 1.345(3) | C24  | C31  | 1.381(3) |
| N4   | C9   | 1.446(3) | C25  | C28  | 1.421(3) |
| N4   | C36  | 1.323(3) | C26  | C27  | 1.495(3) |
| N4   | C41  | 1.467(3) | C28  | C285 | 1.422(4) |
| C1   | C6   | 1.505(3) | C28  | C295 | 1.421(3) |
| C2   | C17  | 1.407(3) | C30  | C42  | 1.426(3) |
| C2   | C25  | 1.358(3) | C31  | C32  | 1.393(3) |
| C3   | C35  | 1.392(3) | C32  | C33  | 1.507(3) |
| C3   | C37  | 1.508(3) | C34  | C42  | 1.433(3) |
| C3   | C40  | 1.392(3) | C35  | C38  | 1.392(3) |

<sup>1</sup>1-X,-Y,1-Z; <sup>2</sup>1-X,1-Y,-Z; <sup>3</sup>-X,-Y,1-Z; <sup>4</sup>+X,-1+Y,1+Z; <sup>5</sup>-X,-1-Y,2-Z

**Table S3.** Bond Angles for the Eu-MOF.

| Atom            | Atom | Atom             | Angle/°   | Atom | Atom | Atom | Angle/°    |
|-----------------|------|------------------|-----------|------|------|------|------------|
| O1 <sup>1</sup> | Eu1  | Eu1 <sup>1</sup> | 73.99(3)  | C24  | C6   | C1   | 119.94(18) |
| O1 <sup>1</sup> | Eu1  | C1 <sup>1</sup>  | 20.93(5)  | C39  | C7   | C42  | 120.33(19) |
| O3              | Eu1  | Eu1 <sup>1</sup> | 118.39(4) | O4   | C8   | C14  | 117.34(16) |
| O3              | Eu1  | O1 <sup>1</sup>  | 133.08(5) | O10  | C8   | O4   | 125.80(18) |
| O3              | Eu1  | C1 <sup>1</sup>  | 132.53(5) | O10  | C8   | C14  | 116.85(17) |
| O4              | Eu1  | Eu1 <sup>1</sup> | 149.74(3) | C12  | C10  | C4   | 121.51(18) |
| O4              | Eu1  | O1 <sup>1</sup>  | 76.43(5)  | C12  | C10  | C20  | 119.52(19) |
| O4              | Eu1  | O3               | 78.41(5)  | C20  | C10  | C4   | 118.81(18) |
| O4              | Eu1  | O6 <sup>2</sup>  | 115.52(5) | C30  | C11  | C21  | 120.3(2)   |
| O4              | Eu1  | O8               | 158.85(5) | C10  | C12  | C22  | 119.70(19) |
| O4              | Eu1  | O10 <sup>3</sup> | 80.50(5)  | C32  | C13  | C16  | 119.99(19) |
| O4              | Eu1  | O11 <sup>4</sup> | 103.78(5) | C18  | C14  | C8   | 120.36(18) |
| O4              | Eu1  | C1 <sup>1</sup>  | 95.88(5)  | C38  | C14  | C8   | 120.16(17) |
| O6 <sup>2</sup> | Eu1  | Eu1 <sup>1</sup> | 64.49(3)  | C38  | C14  | C18  | 119.48(18) |
| O6 <sup>2</sup> | Eu1  | O1 <sup>1</sup>  | 78.74(5)  | C20  | C15  | C26  | 119.6(2)   |
| O6 <sup>2</sup> | Eu1  | O3               | 148.18(5) | C6   | C16  | C13  | 121.04(19) |
| O6 <sup>2</sup> | Eu1  | O10 <sup>3</sup> | 77.13(5)  | C29  | C17  | C2   | 120.7(2)   |
| O6 <sup>2</sup> | Eu1  | O11 <sup>4</sup> | 124.20(5) | C40  | C18  | C14  | 120.08(19) |
| O6 <sup>2</sup> | Eu1  | C1 <sup>1</sup>  | 76.70(5)  | N2   | C19  | C34  | 119.77(19) |
| O8              | Eu1  | Eu1 <sup>1</sup> | 50.15(3)  | C5   | C19  | N2   | 119.5(2)   |

| Atom             | Atom | Atom             | Angle/°    | Atom             | Atom | Atom             | Angle/°    |
|------------------|------|------------------|------------|------------------|------|------------------|------------|
| O8               | Eu1  | O1 <sup>1</sup>  | 124.13(5)  | C5               | C19  | C34              | 120.74(19) |
| O8               | Eu1  | O3               | 82.71(5)   | C15              | C20  | C10              | 120.8(2)   |
| O8               | Eu1  | O6 <sup>2</sup>  | 76.86(5)   | C23              | C21  | C11              | 120.7(2)   |
| O8               | Eu1  | O10 <sup>3</sup> | 86.17(5)   | C26              | C22  | C12              | 120.73(19) |
| O8               | Eu1  | O11 <sup>4</sup> | 80.11(5)   | C21              | C23  | C34              | 120.63(19) |
| O8               | Eu1  | C11              | 103.93(5)  | C31              | C24  | C6               | 120.2(2)   |
| O10 <sup>3</sup> | Eu1  | Eu1 <sup>1</sup> | 125.92(3)  | C2               | C25  | N3               | 120.66(19) |
| O10 <sup>3</sup> | Eu1  | O1 <sup>1</sup>  | 134.92(5)  | C2               | C25  | C28              | 121.52(19) |
| O10 <sup>3</sup> | Eu1  | O3               | 77.40(5)   | C28              | C25  | N3               | 117.78(18) |
| O10 <sup>3</sup> | Eu1  | O11 <sup>4</sup> | 150.29(5)  | C15              | C26  | C27              | 121.6(2)   |
| O10 <sup>3</sup> | Eu1  | C1 <sup>1</sup>  | 148.85(5)  | C22              | C26  | C15              | 119.54(19) |
| O11 <sup>4</sup> | Eu1  | Eu1 <sup>1</sup> | 61.68(3)   | C22              | C26  | C27              | 118.69(19) |
| O11 <sup>4</sup> | Eu1  | O1 <sup>1</sup>  | 73.65(5)   | O7               | C27  | N2               | 123.6(2)   |
| O11 <sup>4</sup> | Eu1  | O3               | 74.81(5)   | O7               | C27  | C26              | 120.39(19) |
| O11 <sup>4</sup> | Eu1  | C1 <sup>1</sup>  | 60.75(5)   | N2               | C27  | C26              | 116.01(18) |
| C11              | Eu1  | Eu1 <sup>1</sup> | 53.97(3)   | C25              | C28  | C28 <sup>6</sup> | 118.4(2)   |
| C1               | O1   | Eu1 <sup>1</sup> | 115.88(12) | C29 <sup>6</sup> | C28  | C25              | 122.68(18) |
| C36              | O3   | Eu1              | 141.11(14) | C29 <sup>6</sup> | C28  | C28 <sup>6</sup> | 118.9(2)   |
| C8               | O4   | Eu1              | 143.65(14) | C17              | C29  | C28 <sup>6</sup> | 120.48(19) |
| C4               | O6   | Eu1 <sup>2</sup> | 132.34(13) | C11              | C30  | N1               | 119.87(19) |

| Atom | Atom | Atom             | Angle/°    | Atom | Atom | Atom | Angle/°    |
|------|------|------------------|------------|------|------|------|------------|
| C1   | O8   | Eu1              | 163.79(14) | C11  | C30  | C42  | 121.16(18) |
| C8   | O10  | Eu1 <sup>3</sup> | 148.02(13) | C42  | C30  | N1   | 118.92(18) |
| C4   | O11  | Eu1 <sup>5</sup> | 143.20(13) | C24  | C31  | C32  | 121.0(2)   |
| C33  | N1   | C30              | 123.06(17) | C13  | C32  | C31  | 118.62(19) |
| C27  | N2   | C19              | 123.57(18) | C13  | C32  | C33  | 123.87(19) |
| C37  | N3   | C25              | 120.79(17) | C31  | C32  | C33  | 117.45(19) |
| C9   | N4   | C41              | 117.3(2)   | O5   | C33  | N1   | 120.8(2)   |
| C36  | N4   | C9               | 120.6(2)   | O5   | C33  | C32  | 120.5(2)   |
| C36  | N4   | C41              | 122.2(2)   | O9   | C33  | N1   | 119.3(3)   |
| O1   | C1   | Eu1 <sup>1</sup> | 43.19(9)   | O9   | C33  | C32  | 117.2(3)   |
| O1   | C1   | C6               | 117.97(17) | N1   | C33  | C32  | 117.35(19) |
| O8   | C1   | Eu1 <sup>1</sup> | 86.10(11)  | C19  | C34  | C42  | 117.93(19) |
| O8   | C1   | O1               | 123.95(18) | C23  | C34  | C19  | 122.95(19) |
| O8   | C1   | C6               | 117.98(16) | C23  | C34  | C42  | 119.09(19) |
| C6   | C1   | Eu1 <sup>1</sup> | 145.51(13) | C3   | C35  | C38  | 120.4(2)   |
| C25  | C2   | C17              | 120.0(2)   | O3   | C36  | N4   | 123.7(2)   |
| C35  | C3   | C37              | 124.43(19) | O2   | C37  | N3   | 122.3(2)   |
| C35  | C3   | C40              | 118.59(19) | O2   | C37  | C3   | 120.5(2)   |
| C40  | C3   | C37              | 116.98(18) | N3   | C37  | C3   | 117.27(18) |
| O6   | C4   | C10              | 117.38(17) | C14  | C38  | C35  | 120.35(19) |



| Atom | Atom | Atom | Angle/°    | Atom | Atom | Atom | Angle/°    |
|------|------|------|------------|------|------|------|------------|
| O11  | C4   | O6   | 125.66(18) | C7   | C39  | C5   | 120.7(2)   |
| O11  | C4   | C10  | 116.94(17) | C18  | C40  | C3   | 121.04(19) |
| C19  | C5   | C39  | 120.6(2)   | C7   | C42  | C30  | 122.20(18) |
| C16  | C6   | C1   | 120.73(17) | C7   | C42  | C34  | 119.60(19) |
| C16  | C6   | C24  | 119.06(19) | C30  | C42  | C34  | 118.11(18) |

<sup>1</sup>1-X,-Y,1-Z; <sup>2</sup>1-X,1-Y,-Z; <sup>3</sup>-X,-Y,1-Z; <sup>4</sup>+X,-1+Y,1+Z; <sup>5</sup>+X,1+Y,-1+Z; <sup>6</sup>-X,-1-Y,2-Z
